1 **Single-molecule genome assembly of the Basket Willow, *Salix viminalis*, reveals earliest stages of sex**  
2 **chromosome expansion**

3  
4 Pedro Almeida<sup>1\*</sup>, Estelle Proux-Wera<sup>2,3,4</sup>, Allison Churcher<sup>3,5</sup>, Lucile Soler<sup>3,6</sup>, Jacques  
5 Dainat<sup>2,6</sup>, Pascal Pucholt<sup>7,9</sup>, Jessica Nordlund<sup>2,8</sup>, Tom Martin<sup>2,8</sup>, Ann Christine Rönnerberg-  
6 Wästljung<sup>9</sup>, Björn Nystedt<sup>2,3,10</sup>, Sofia Berlin<sup>9\*\*</sup>, Judith E. Mank<sup>1,11,12\*\*</sup>

7  
8 <sup>1</sup> Department of Genetics, Evolution & Environment, University College London, UK

9 <sup>2</sup> Science for Life Laboratory, Uppsala University, Sweden

10 <sup>3</sup> National Bioinformatics Infrastructure, Sweden

11 <sup>4</sup> Department of Biochemistry and Biophysics, Uppsala University, Sweden

12 <sup>5</sup> Department of Molecular Biology, Umeå University, Sweden

13 <sup>6</sup> Department of Medical Biochemistry and Microbiology, Uppsala University, Sweden

14 <sup>7</sup> Department of Medical Sciences, Section of Rheumatology, Uppsala University, Sweden

15 <sup>8</sup> Department of Medical Sciences, Molecular Medicine, Uppsala University, Sweden

16 <sup>9</sup> Department of Plant Biology, Swedish Agricultural University, Sweden

17 <sup>10</sup> Department of Cell and Molecular Biology, Uppsala University, Sweden

18 <sup>11</sup> Department of Organismal Biology, Uppsala University, Sweden

19 <sup>12</sup> Department of Zoology, University of British Columbia, Canada

20

21 \* Corresponding author: [pedro.almeida@ucl.ac.uk](mailto:pedro.almeida@ucl.ac.uk)

22 \*\* Shared senior authors

23

24

25 **Short title:** The earliest stages of sex chromosome expansion in the basket willow

26

27

## 28 **Abstract**

29 Sex chromosomes have evolved independently multiple times in eukaryotes and are  
30 therefore considered a prime example of convergent genome evolution. Sex chromosomes  
31 are known to emerge after recombination is halted between a homologous pair of  
32 chromosomes and this leads to a range of non-adaptive modifications causing the gradual  
33 degeneration and gene loss on the sex-limited chromosome. However, because studies on  
34 sex chromosomes have primarily focused on old and highly differentiated sex  
35 chromosomes, the causes of recombination suppression and the pace at which  
36 degeneration subsequently occurs remain unclear. Here, we use long- and short-read single  
37 molecule sequencing approaches to assemble and annotate a draft genome of the basket  
38 willow, *Salix viminalis*, a species with a female heterogametic system at the earliest stages  
39 of sex chromosome emergence. Our single-molecule approach allowed us to phase the  
40 emerging Z and W haplotypes in a female, and we detected very low levels of Z/W  
41 divergence, largely the result of the accumulation of single nucleotide polymorphisms in the  
42 non-recombining region. Linked-read sequencing of the same female and an additional male  
43 (ZZ) revealed the presence of two evolutionary strata supported by both divergence  
44 between the Z and W haplotypes and by haplotype phylogenetic trees. Gene order is still  
45 largely conserved between the Z and W homologs, although a few genes present on the Z  
46 have already been lost from the W. Furthermore, we use multiple lines of evidence to test  
47 for inversions, which have long been assumed to halt recombination between the sex  
48 chromosomes. Our data suggest that selection against recombination is a more gradual  
49 process at the earliest stages of sex chromosome formation than would be expected from  
50 an inversion. Our results present a cohesive understanding of the earliest genomic

51 consequences of recombination suppression as well as valuable insights into the initial

52 stages of sex chromosome formation.

53

54

55

56

57

58

## 59 Introduction

60 Sex chromosomes, genomic regions associated with either males or females, have evolved  
61 independently many times in the eukaryotes [1, 2]. Sex chromosomes come in two general  
62 forms in organisms where sex is expressed in the diploid phase of the life cycle. X-Y sex  
63 chromosomes form where the Y chromosome is associated with males (male  
64 heterogamety), and Z-W sex chromosomes form where the W is associated with females  
65 (female heterogamety). Both these sex chromosome types emerge after recombination is  
66 halted between a homologous pair of chromosomes [3, 4], which allows the X and Y or Z  
67 and W chromosomes to diverge from each other. Studies in systems with unrelated and  
68 highly diverged sex chromosomes have revealed many shared genomic properties across a  
69 broad array of taxa [1, 2, 5], and sex chromosomes therefore represent an important  
70 example of convergent genome evolution.

71 In addition to promoting the sex chromosomes to diverge from one another, recombination  
72 arrest in the sex determining region (SDR) leads to a range of non-adaptive consequences  
73 for the sex-limited Y or W chromosome. These include the build-up of deleterious variation  
74 and repetitive elements, as well as loss of gene activity [6–8]. Due to the longstanding focus  
75 on systems with highly divergent sex chromosomes, the speed and order at which these  
76 processes occur after recombination suppression remain largely unclear.

77 Additionally, over evolutionary time, the non-recombining region can expand, resulting in  
78 strata, or regions with differing levels of divergence between the X and Y or Z and W  
79 chromosomes [9–13]. Expansion of the non-recombining region and the emergence of new  
80 strata may occur gradually, in which case we might expect only partial recombination  
81 suppression in the youngest stratum, in conjunction with substantial heterogeneity in X-Y or

82 Z-W divergence [14–17]. Alternatively, some have suggested that strata form  
83 instantaneously, via large-scale inversions on the Y or W chromosome [18], which prevent  
84 recombination between the sex chromosomes along the entirety of the reversed region.  
85 The answers to these questions have important implications beyond sex chromosomes.  
86 Halting recombination permanently links co-adapted gene complexes [19–22], also referred  
87 to as supergenes. Y and W chromosomes are thought to represent sex-specific supergenes,  
88 linking loci with sex-benefit alleles to the sex determining locus [23–26]. Supergenes have  
89 resurfaced recently as a major potential adaptive mechanism [27–31], and in so doing have  
90 implicated recombination suppression as a crucial component of complex phenotypic  
91 adaptation.

92 Sex chromosomes are therefore a powerful system to understand the evolutionary  
93 consequences of recombination suppression and supergene formation. Furthermore,  
94 detailed studies of nascent sex chromosomes are critical if we want to understand the initial  
95 causes of recombination suppression, as well as the order and rate of the evolutionary  
96 processes that follow it. For example, recent studies of young sex chromosome systems  
97 have revealed substantial intra-specific variation in the degree of recombination  
98 suppression across populations [32–35], suggesting a dynamism not normally observed in  
99 older, more diverged sex chromosome systems.

100 Plants in particular are useful in the study of the earliest stages of sex chromosome  
101 formation, as many plant sex chromosomes emerged only very recently in evolutionary time  
102 [36–39]. Recent studies based on next-generation sequencing of plant sex chromosomes  
103 have shown important patterns in the earliest stages of sex determination [40–45]. Studies  
104 on plant sex chromosomes have also revealed the importance of haploid selection in

105 maintaining gene activity in the non-recombining region [15, 46] in the face of rapid loss of  
106 gene expression following recombination suppression [8, 47].

107 Recent work in *Salix viminalis*, the basket willow, has revealed the presence of nascent Z-W  
108 sex chromosomes, with a highly restricted SDR [48, 49]. The sex chromosomes of *Salix* have  
109 evolved independently from the X-Y sex chromosome system in the sister genus *Populus*  
110 [48, 50], which also exhibits very low levels of divergence [37]. The Salicaceae family, which  
111 includes willows and poplars, therefore presents a powerful system for studying the earliest  
112 stages of sex chromosome formation. Here, we use long- and short-read single-molecule  
113 sequencing (PacBio and 10x Genomics Chromium linked reads approaches) in *S. viminalis* to  
114 assemble a female reference genome. Importantly, our approach allowed us to obtain  
115 phased male and female haplotypes using large, continuous haplotype scaffolds. This allows  
116 us to transcend the current limitations of short-read next-generation sequencing, which  
117 hinder the assembly of repetitive regions, common in SDRs, as well as complicate accurate  
118 phasing. Our results shed unprecedented detail on the earliest stages of sex chromosome  
119 formation, and reveal that the initial stages of recombination suppression are incomplete,  
120 as would be expected from gradual selection against recombination rather than a single  
121 large-scale inversion.

122

## 123 **Results & Discussion**

### 124 ***Assembly and annotation of the Basket Willow reference genome***

125 In order to gain a better understanding on the evolution and genomic architecture of the  
126 recently formed sex chromosomes in *Salix viminalis* we sequenced and assembled the  
127 complete genome of a single diploid heterogametic female (ZW) which was previously part

128 of a large association mapping population [51]. To this end, we used a combination of long-  
129 and short-read single-molecule sequencing strategies and generated ~19 Gb of Pacific  
130 Biosciences (PacBio) long reads in a female and ~58 Gb of 10x Genomics linked-reads in the  
131 same female and a male (Table S1). The full assembled genome has ~357 Mb of sequence  
132 spanning 2,372 scaffolds above 1 kb in length, an N50 value of ~1.3 Mb and with 92% of the  
133 genome in scaffolds longer than 50 kb. With this estimated genome size, our sequencing  
134 constitutes >50X PacBio and >160X 10x Genomics coverage for autosomes, and >25X and  
135 >40X coverage of the W chromosome accounting for the hemizygous nature of the female-  
136 limited region.

137 Assembly quality, as assessed by whole-genome DNA and transcriptome short-read  
138 mapping, suggests a high completeness and contiguity with ~98% and ~84% of the reads  
139 respectively aligned to the assembled sequence (Table S2). Importantly, we obtained a high  
140 proportion of properly paired reads (Table S2). An initial assessment also identified more  
141 than 94% of complete core Embryophyta genes in the assembly (Table S2). We also mapped  
142 1987 Genotype by Sequencing (GBS) [48, 52] markers in order to verify their presence and  
143 order. Consequently, our reference genome of the basket willow *S. viminalis* is essentially  
144 complete and properly assembled. Given the difficulties inherent in assembling an ancient  
145 polyploid genome such as *S. viminalis* [53], the relative completeness of our assembly  
146 reveals the benefits of incorporating single-molecule and long-read sequencing.

147 Annotation of the basket willow genome followed an in-house pipeline based on maker  
148 v3.00.0 [54] that combined transcriptome data [49, 55], reference proteins and *ab-initio*  
149 predictors. We identified 36,490 gene models, with 28,212 (77.3%) of them having  
150 functional annotation, and predicted 3,469 ncRNA and 1,139 tRNA (Table S3). Finally, we

151 also identified several families of repetitive elements which together represent ~35% of the  
152 assembly. The basket willow genome is publicly available for the community through the  
153 PopGenIE Integrative Explorer (<http://popgenie.org>) [56].

#### 154 ***Delimitation of the SDR in the female assembly***

155 Differences between male and female genomes in read depth or single nucleotide  
156 polymorphim (SNP) density can be used to identify different forms of sex chromosome  
157 divergence [12, 57]. In nascent sex chromosome systems, this method is particularly useful  
158 when combined with genetic mapping studies of gender (in plants) or sex (in animals) [35,  
159 49]. These methods are based on the different patterns of divergence and dosage between  
160 males and females on the sex chromosomes. In female heterogametic systems, W-specific  
161 reads are present only in females, resulting in higher female read coverage for W scaffolds.  
162 Conversely, as the W degrades, we expect a greater male read depth for the corresponding  
163 region of the Z chromosome, as females retain only one copy of the Z. Additionally, in the  
164 earliest stages of recombination suppression, we expect W-regions to retain significant  
165 similarity to the Z chromosome, and therefore females may show similar read depth for  
166 these regions as males. However, once recombination is halted, the W is expected to  
167 accumulate polymorphisms that are not shared with the Z, and so we might expect a  
168 greater density of SNPs in females compared to males in these regions even before  
169 significant divergence lowers mapping efficiency.

170 In order to assess these two levels of sex chromosome divergence, we mapped male and  
171 female short-read DNA-seq data (~69X and ~66X average coverage for females and males  
172 respectively) to our female assembly. Because we assembled the genome of a  
173 heterogametic Z-W female, and given the relatively high levels of heterozygosity across the



174 genome (~0.5% or 1 SNP per 200 bp), we expect a limited proportion of divergent regions in  
175 the genome, including Z and W haplotypes, to assemble separately in different scaffolds. As  
176 this would likely bias our SNP density estimates, where regions with elevated numbers of  
177 polymorphisms would appear to be homozygous, we first constructed a non-redundant  
178 assembly by removing smaller scaffolds that showed strong evidence of sequence overlap  
179 with longer scaffolds. We then aligned our non-redundant scaffolds to the *Populus*  
180 *trichocarpa* genome [58], revealing broad synteny as expected between these sister genera  
181 (Fig. S1, Fig. 1A). In total, we anchored ~272 Mb (76.4% of the full assembly) to *P.*  
182 *trichocarpa* chromosomes.

183 We previously identified chromosome 15 as the sex chromosome [48, 49] and mapped the  
184 extent of the SDR on this chromosome (highlighted in pink, Fig. 1). Our results show that the  
185 five scaffolds within the SDR show significant deviations of both female:male SNP density,  
186 indicative of the build-up of female-specific SNPs on the W, and/or female:male read  
187 coverage differences, indicating regions of significant divergence between the Z and W  
188 chromosomes (Fig. 1). It is important to note that because *S. viminalis* exhibits only a limited  
189 divergence between the Z and W, and our long-read assembly was based on a female  
190 sample, the assembly of the sex chromosome regions likely represents Z-W chimeras. This  
191 chimerism is evident in scaffolds 150 and 163, which both show a region of similar coverage  
192 in males and females and a region of strong female-bias that likely represents W-specific  
193 genetic material (Fig. 1). These scaffolds, in addition to scaffold 225, show the greatest  
194 deviations in read depth between males and females, and likely represent a region where  
195 recombination was first suppressed between the emerging Z and W chromosomes (Stratum  
196 I). Our previous linkage mapping with GBS markers [48, 52] also identified sex-linked  
197 markers in scaffold 127 (Fig. S2), however this region shows far fewer differences in

198 female:male read depth while having higher polymorphism in females relative to males. As  
199 a result, this likely represents a region where recombination has been suppressed very  
200 recently, or remains partially incomplete (Stratum II).

201 The SDR region spans a total of ~3.4 Mb, or ~3.1 Mb when excluding the putatively chimeric  
202 regions, and this estimate is somewhat smaller than that of our previous estimation of ~5.3  
203 Mb [49]. This difference is likely due to the fact that our previous estimate was based on a  
204 male assembly and included non-aligned regions on chromosome 15 of *P. trichocarpa*. In  
205 *Salix purpurea*, a close relative of *S. viminalis*, the SDR is also located on chromosome 15,  
206 however it is much larger (>10 Mb) [59]. It has been suggested that these sex chromosomes  
207 share a common origin [59], although it remains unclear whether the SDR in these two  
208 species is in the same syntenic region. In order to test whether the SDR regions overlapped  
209 between the two species, we aligned our *S. viminalis* genome assembly to the *S. purpurea*  
210 assembly. We found that all scaffolds inferred to be part of the *S. viminalis* SDR aligned to  
211 the SDR region in *S. purpurea* (Fig. S3), suggesting a shared origin, albeit with several  
212 potential rearrangements between them.

### 213 ***Two evolutionary strata on the S. viminalis sex chromosomes***

214 It is possible to quantify divergence between the sex chromosomes by comparing  $d_N$  (a  
215 measure of non-synonymous divergence) and  $d_S$  (a measure of synonymous divergence)  
216 between males and females in the sex-linked region. To accurately estimate this divergence,  
217 we constructed 10x Genomics Chromium *de novo* assemblies using one individual of each  
218 sex. Fully phased diploid genotypes were obtained for 65.8% and 61.6% of the genome in  
219 our female and the male samples respectively. Similar phasing efficiency was also achieved  
220 for chromosome 15 (Fig. S4). Our results show significantly greater  $d_N$  and  $d_S$  between

221 Stratum I and the genomic average in our female sample, but not in our male sample  
222 (female  $d_S$   $p=0.00072$ ; female  $d_N$ :  $p=0.000077$ ; male  $d_S$   $p=0.65$ ; male  $d_N$   $p=0.25$ , based on  
223 Mann-Whitney U-test relative to the genome, Fig. 2), indicating detectable divergence  
224 between the Z and W in this region. When Stratum II is also included, the SDR does not  
225 show significant divergence in the female (female  $d_S$   $p=0.89$ ; female  $d_N$   $p=0.061$ ; male  $d_S$   $p$   
226  $=0.99$ ; male  $d_N$   $p=0.94$ , Mann-Whitney U-test relative to the genome) despite the presence  
227 of sex-linked markers in this region (Fig. S2), reinforcing the conclusion that either  
228 recombination was suppressed very recently in this region, or is not yet entirely complete.  
229  $d_N$  and  $d_S$  were also marginally significantly higher between the pseudo-autosomal region  
230 (PAR) and the genome in females ( $d_S$   $p=0.0019$ ,  $d_N$   $p=0.0133$ , Mann-Whitney U-test), but  
231 not in males ( $d_S$   $p=0.93$ ,  $d_N$   $p=0.94$ , Mann-Whitney U-test).

232 Phylogenetic analysis of Z-W orthologs in conjunction with outgroup species can reveal the  
233 relative timing of recombination suppression [13]. We therefore used our phased male and  
234 female haplotypes in the SDR together with orthologous genes from two closely related  
235 *Salix* species (*S. suchowensis* and *S. purpurea*) and poplar (*P. trichocarpa*). Our phylogenetic  
236 analyses provide further support for two distinct evolutionary strata (Fig. 3, Fig. S5).

237 Phylogenies based on genes located in Stratum I tend to show one female haplotype,  
238 corresponding to the W haplotype, clustering as an outgroup from the other three *S.*  
239 *viminalis* haplotypes (two male Z haplotypes and the female Z haplotype). This phylogenetic  
240 structure indicates that recombination ceased in Stratum I prior to *S. viminalis* speciation.

241 The phylogenetic structure in Stratum II shows most female haplotypes clustered together  
242 with the male haplotypes, in line with more recent, or possibly partially incomplete,  
243 recombination suppression.

244 Distinct evolutionary strata are evident in many sex chromosome systems [9–13], and the  
245 mechanism behind recombination suppression, whether it is a large-scale inversion on the  
246 sex-limited chromosome [18] or a more gradual suppression of recombination [14–17]  
247 remains unclear. Crucially, males and females can differ substantially both in frequency and  
248 in location of recombination hotspots [60–63], referred to as heterochiasmy. Local sex-  
249 specific recombination rates within the genome may be important in both initial sex  
250 chromosome divergence and subsequent expansion of the non-recombining region [26].  
251 Importantly, once recombination has been halted around the SDR in the heterogametic sex,  
252 selection to maintain gene order is abolished [64], and selection against inversions is greatly  
253 reduced. This suggests that inversions might follow recombination suppression, as has been  
254 recently observed [65], even if they are not the cause of recombination suppression initially.  
255 It is worth noting that we observed considerable overlap in both  $d_S$  and  $d_N$  estimates (Fig.2)  
256 between the two strata and also the incomplete segregation of some female Stratum I Z and  
257 W haplotypes (Fig. S5), suggesting a gradual divergence in the sex chromosomes of *S.*  
258 *viminalis*. This gradual divergence is not consistent with a major inversion, which would  
259 result in a more similar phylogenetic signal for all Z-W orthologs within the inversion as  
260 recombination would be suppressed at the same time. Older sex chromosomes also show  
261 substantial variation in divergence within perceived strata [10, 13], however the limited  
262 number of loci remaining on the oldest regions of sex-limited chromosome complicates  
263 these analyses. In these older systems, strata may also have formed through shifts in sex-  
264 specific recombination hotspots, resulting in gradual expansions rather than large-scale  
265 inversion events.

266 Furthermore, if inversions are the cause of recombination suppression between the Z and  
267 W, we would expect our female assembly to be heterozygous for inversions between the Z  
268 and W chromosomes in strata. We note that we observe no evidence of large-scale  
269 inversions associated with either Stratum I or Stratum II in our assembly. It is of course  
270 possible that inversions formed within the few remaining breakpoints in between our  
271 scaffolds, which we would not be able to detect. However, the long-read nature of our  
272 assembly, and the resulting large contig size, offer substantial power to detect such  
273 inversions, reducing the likelihood of type II error.

274 Together, our evidence suggests that at the earliest stages of sex chromosome formation  
275 and expansion, selection against recombination is a gradual process, and may result from  
276 changes in sex-specific recombination hotspots. Therefore, theoretical models about local  
277 changes in heterochiasmy as a result of sexually antagonistic alleles [62, 63] may prove to  
278 be key to sex chromosome evolution. Alternatively, recent evidence from fungal mating-  
279 type chromosomes, analogous to sex chromosomes in many ways, has suggested non-  
280 adaptive explanations for the origin and expansion of the non-recombining region [66, 67].

281 This model also explains some of the curious intra-specific heterogeneity in the extent of sex  
282 chromosome divergence in younger systems [32–35]. If recombination suppression occurs  
283 more gradually, population-level differences in sex-specific recombination hotspots, often  
284 observed [61], will drive different levels of divergence in the earliest stages of sex  
285 chromosomes.

### 286 ***Degeneration of the W chromosome***

287 Although studies of old, highly degenerate Y and W chromosomes have revealed the  
288 accumulation of significant repetitive DNA [68, 69], it remains unclear how quickly this

289 material accumulates after recombination suppression. Additionally, the build-up of  
290 repetitive elements on the W chromosome may in itself act as a mechanism to suppress  
291 recombination with the corresponding region of the Z [70–72]. However, the difficulty  
292 associated with phasing short read data has previously hampered efforts to study the  
293 earliest stages of sex chromosome divergence. Although it is possible to identify sex-specific  
294 transcripts from pedigrees based on inheritance through familial pedigrees [73–76], this  
295 method misses non-coding sequence, making it difficult to assess whether non-coding  
296 repetitive elements are associated with the earliest stages of recombination suppression.

297 In order to identify W-specific sequence, we mapped female and male re-sequencing reads  
298 to our female assembly. We were able to identify an additional subset of 35 scaffolds  
299 spanning ~3.3 Mb and with 119 protein coding genes (Table S4), that likely represent W-  
300 specific sequence, i.e., with significant excess of female:male read coverage over the entire  
301 scaffold length based on genomic confidence intervals. Despite the recent origin of  
302 recombination suppression, these scaffolds show a significant enrichment of repetitive  
303 sequences in comparison with both the corresponding Z-linked portion of the SDR and the  
304 genomic average (Fig. S6, W-genome  $p < 1 \times 10^{-46}$ ; W-SDR  $p = 0.00058$ , Mann-Whitney U-  
305 test). These results suggest that either repetitive sequence can accumulate very quickly  
306 following the arrest of recombination, or alternatively repetitive elements may in fact act to  
307 halt recombination in the absence of inversions.

308 The loss of recombination on the sex-limited SDR has important evolutionary effects,  
309 namely the build-up of deleterious variation and repetitive elements, as well as loss of gene  
310 activity [6–8]. The latter effect in particular can lead to profound differences in gene content  
311 between X and Y or Z and W chromosomes in older sex chromosome systems [6]. Studies in

312 other plant sex chromosomes have indicated that gene loss occurs in the SDR [8, 47],  
313 however it remains unclear how quickly this occurs. Additionally, the extended haploid  
314 phase in plants may prevent loss of SDR genes expressed in the haploid phase [15, 46].

315 In order to identify gene content differences between the Z and the W chromosome, we  
316 used two of the W-linked scaffolds identified above, scaffolds 148 and 211. These scaffolds  
317 align almost entirely to the SDR where read mapping coverage is male-biased (Z-linked), as  
318 would be expected for sex-linked homologous regions (Fig. 4A). In both cases we observed a  
319 high degree of synteny in the aligned regions, indicating that both gene content and gene  
320 order are still largely conserved between Z and W homologs, even in the most divergent  
321 region of the SDR (Fig. 4B, 4C). This is likely a function of both the recent divergence of this  
322 sex chromosome system [49], as well as the preservative effects of haploid selection on  
323 genes expressed in plant reproductive tissues. Nevertheless, seven protein coding genes on  
324 the corresponding Z-linked scaffolds with known products are missing from the W assembly.  
325 Using a translated BLAST search of these proteins to the corresponding Z-linked scaffolds  
326 and considering a minimum query coverage of 80%, we inferred that at least two of them  
327 (os02g0180000 on scaffold 163 and TIR on scaffold 225) have likely been pseudogenized  
328 on the W. These results suggest that gene loss can occur very quickly, even in nascent sex  
329 chromosome systems.

330 We also scanned for genes unique to the *S. viminalis* W chromosome, or without preserved  
331 synteny to the Z homolog, as possible sex determining loci. We recovered several genes,  
332 including WOX1, as well as two genes in tandem of the two-component response regulator,  
333 ARR5 and ARR17 (Table 1). In *Arapidopsis thaliana*, ARR proteins are the final targets of the  
334 cytokinin signalling system, which is known to play important roles in flower development

335 and floral sex differentiation [77, 78]. WOX1 is a WUSCHEL-related homeobox protein,  
336 involved in the central regulatory pathway that coordinates stem cell proliferation with  
337 differentiation [79]. Interestingly, the *Silene latifolia* homolog of WOX1, SIWUS1, is also sex-  
338 linked on the X chromosome and apparently lost the homologous copy in the Y  
339 chromosome [80]. We found a WOX1 ortholog in scaffold 150 with ~88% sequence identity  
340 and an ortholog for ARR5 on scaffold 28 with ~95% sequence identity suggesting either  
341 recent duplications or translocations to the W-linked sequence. For ARR17, we did not  
342 recover an ortholog in the genome, or evidence for a pseudogene in the Z chromosome,  
343 suggesting that it most likely originated through a translocation to the W.

344 It is worth noting that dioecy evolved early in the Salicaceae lineage in which *S. viminalis* is  
345 embedded, and is shared by most members of the clade [81]. This means that the standard  
346 model for the evolution of sex chromosomes in plants, which assumes an immediate  
347 hermaphrodite ancestor, may not be applicable. The model posits two linked mutations  
348 encoding male- and female-sterility [82] as the progenitor of sex chromosomes, and this  
349 model has received some empirical support [41]. However, the ancient dioecy found in  
350 Salicaceae and the observation of small and heterogeneous levels of divergence in the  
351 basket willow [49] and poplar [37] sex chromosomes are difficult to reconcile with this two-  
352 gene model. Indeed, recent work has pointed out alternative sex determination  
353 mechanisms in flowering plants, either determined by a single gene as in the case of  
354 *Diospyros* [40] or, as in *Cucumis*, as a polygenic trait controlled by several genes distributed  
355 across different chromosomes [83]. The Salicaceae family with its young sex chromosomes  
356 derived from ancient dioecy therefore provides a valuable comparative system to elucidate  
357 this process.



358

## 359 **Concluding remarks**

360 Here, we use multiple types of single-molecule sequencing to assemble the genome of the  
361 basket willow *S. viminalis*, and used this to reveal the earliest stages of sex chromosome  
362 evolution. This approach allows us unprecedented power to phase our data, allowing us to  
363 resolve Z and W haplotypes at this early stage of divergence. Our results suggest that the  
364 SDR is of limited size and divergence, and we recover no evidence that recombination  
365 suppression is due to a large-scale inversion. Even at this early stage of divergence, we see  
366 evidence of pseudogenization and the accumulation of repetitive elements in the SDR,  
367 suggesting that these processes occur very swiftly after recombination ceases. In total, our  
368 results shed new light on the fundamental process of sex chromosome formation.

369

## 370 **Materials and Methods**

### 371 ***Plant material and DNA extraction***

372 Fresh young leaves (approximately 200 mg) were sampled from a female and a male *S.*  
373 *viminalis* (accession 78183 and 81084, respectively), described in [51] and [84] and DNA was  
374 extracted following a CTAB-protocol described in [49]. In brief, approximately 200 mg fresh  
375 leaves were snap frozen and pulverized. To every sample, 950  $\mu$ l of extraction buffer (100  
376 mM TrisHCl pH 7.5–8, 25 mM EDTA, 2 M NaCl, 2% (w/v) CTAB, 2% (w/v) PVP K30, 5% (w/v)  
377 PVPP, 50  $\mu$ g/ml RNase) was added and the sample was thoroughly mixed before incubation  
378 for 30 min at 65 °C. Subsequently, 300  $\mu$ l Chloroform:isoamylalcohol 24:1 was added, the  
379 sample mixed and centrifuged for 10 min at 13,000 rpm, the supernatant was transferred to  
380 a new tube, and the process repeated. 1.5 volumes of ice-cold isopropanol was added to the

381 supernatant followed by an incubation over night at  $-20^{\circ}\text{C}$ . After centrifugation for 10 min  
382 at 13,000 rpm at  $4^{\circ}\text{C}$ , the supernatant was removed and the pellet rinsed with chilled 100%  
383 EtOH followed by another centrifugation of 5 min at 13,000 rpm at  $4^{\circ}\text{C}$ . The supernatant  
384 was then removed and the DNA was air dried before it was dissolved in 100  $\mu\text{l}$  TE buffer (10  
385 mM TrisHCl, 1 mM EDTA). DNA concentration was assessed by Qubit 3.0 Fluorometer  
386 (Thermo Fisher Scientific).

### 387 ***PacBio long-read library preparation and sequencing***

388 A single SMRT-bell library with 20 kb insert size was constructed from 10  $\mu\text{g}$  of pure high-  
389 molecular weight DNA from one *S. viminalis* female (accession 78183) according to the  
390 manufacturer's protocol (Pacific Biosciences). This library was sequenced on 48 SMRT cells  
391 using P5-C3 chemistry and 4 hour movies were captured for each SMRT cell using the PacBio  
392 RSII sequencing platform (Pacific Biosciences). Primary analysis and error correction of the  
393 raw data was done using SMRT Portal (Pacific Biosciences). After filtering, the mean read  
394 length was 8,924 bp (longest read was 61 kbp) and a total of  $\sim 19.2$  Gbp of data were  
395 recovered.

### 396 ***10x Genomics Chromium linked reads library preparation and sequencing***

397 For both accessions (78183 and 81084) sequencing libraries were prepared from 0.75 ng  
398 DNA using the Chromium TM Genome Library preparation kit according to the  
399 CG00022\_Chromium Genome Reagent Kit User Guide\_RevA. The library preparation was  
400 performed according to the manufacturers' instructions with the exception that 0.75 ng was  
401 used for library preparation instead of 1.25 ng recommended by the manufacturer's  
402 instructions. This was done to account for the smaller genome size of *S. viminalis* compared  
403 to the human genome for which the protocol was optimized. The libraries were sequenced

404 on an Illumina HiSeqX with a paired-end 150bp read length using v2.5 sequencing chemistry  
405 (Illumina Inc.), resulting in ~58 Gb of data

#### 406 ***DNA extraction and short-read Illumina sequencing***

407 We generated additional Illumina sequencing data for the female accession 78183, the  
408 same accession used to assemble the reference genome. DNA was extracted from fresh  
409 leaves using the Fast DNA Kit (MP Biomedicals) according to the manufacturer's  
410 instructions. Two libraries with 165 and 400 bp insert size respectively were generated with  
411 the TruSeq DNA v2 kit (manual #15005180) following the manufacturers protocol and  
412 sequenced on one lane each with Illumina HiSeq2000, 100bp paired-end read length and v3  
413 chemistry generating ~28 GB of bases (Table S1).

#### 414 ***Reference genome assembly and annotation***

415 Falcon v0.4.2 [85] was used to assemble the sub-reads from 48 SMRT cells. This first draft  
416 assembly was then polished using Quiver from the Pacific Biosciences' SMRT suite (v2.3.0)  
417 with the PacBio reads. The resulting assembly was then corrected with Pilon v 1.17 [86]  
418 using both Illumina libraries from the same individual at 80X and 53X coverage. In addition,  
419 a 10x Genomics assembly for the same female individual was also obtained using the  
420 pseudohap-style output of Supernova v2.0.1 [87]. This 10x Genomics assembly and the  
421 PacBio assembly were then merged using Quickmerge v20160905 [88], increasing the  
422 assembly size by ~8 Mb. Finally, the preads (corrected PacBio reads obtained after the first  
423 step of Falcon assembly) and the Supernova pseudohap assembly were used to scaffold the  
424 merged assembly using LINKS v1.8.4 [89]. Finally, we corrected some homozygous SNPs and  
425 small insertions and deletions in the assembly using Long Ranger v2.1.2 with the 10x  
426 Genomics Chromium reads of the same female individual.

427 Annotation of the *S. viminalis* reference genome was performed with Maker v3.00.0 [54].

428 The Maker pipeline was run twice; first based on protein and RNA sequence data only (later  
429 used to train *ab-initio* software) and a second time combining evidence data and *ab-initio*  
430 predictions. High-confidence protein sequences were collected from the Uniprot database  
431 [90], for proteins belonging to the Swissprot section that contain only manually annotated  
432 and reviewed curations (downloaded on August 2016), and two other specific protein sets  
433 from *Salix suchowensis* and *Populus trichocarpa*. Furthermore, to support gene predictions  
434 we also used selected libraries of RNA-seq data from our previous studies collected from  
435 different individuals and tissues [49, 55]. As basis for the construction of gene models, we  
436 combined *ab-initio* predictions from three sources (Augustus v2.7 [91], GeneMark\_ES\_ET  
437 v4.3 [92] and SNAP [93]). GeneMark\_ES\_ET was self-trained with the genome sequence. To  
438 train Augustus and SNAP, we first ran the Maker pipeline a first time to create a profile  
439 using the protein evidence along with RNA-seq data. Both Augustus and SNAP were then  
440 trained with a selected set of genes from this initial evidence-based annotation. We  
441 excluded genes with an Annotation Edit Distance (AED) score equal to 1 to avoid potentially  
442 false annotations. Functional inference for genes and transcripts was performed using the  
443 translated CDS features of each coding transcript. Protein sequences were searched with  
444 BLAST in the Uniprot/Swissprot reference dataset in order to retrieve gene names and  
445 protein functions as well as in the InterProscan v5.7-48 database to retrieve additional  
446 annotations from different sources.

447 We created a repeat library with an in-house pipeline using RepeatModeler v1.0.8 [94].  
448 Identification of repeat sequences in the genome was performed using RepeatMasker  
449 v4.0.3 [95] and RepeatRunner [96]. tRNAs were predicted with tRNAscan v1.3.1 [97] and

450 broadly conserved ncRNAs were predicted with the Infernal package [98] using the RNA  
451 family database Rfam v11 [99].

#### 452 ***Identification of allelic scaffolds in single-molecule de-novo assemblies***

453 Linked reads for the female and male accessions were assembled with Supernova v2.0.1  
454 [87]. Fully phased heterozygous haplotypes, together with non-phased sequence (nominally  
455 homozygous), were obtained using the megabubbles-style output and a minimum sequence  
456 length of 1 kb. Diploid assemblies were soft-masked with RepeatMasker v4.0.7 [95] with the  
457 “RMBlast” v2.6.0+ search engine and using our custom *S. viminalis* repeat library generated  
458 during genome annotation.

459 We used sequence alignments in order to identify homologous haplotypes in our single-  
460 molecule assemblies. A repeat-masked assembly is first aligned to itself with LAST v926  
461 [100] using the sensitive DNA seeding MAM4 [101] and masking of repeats during alignment  
462 with the -cR11 option. To avoid false matches caused by repetitive sequences and  
463 paralogous scaffolds, orthologous alignments were generated with last-split and alignments  
464 mostly comprised of masked sequence were then discarded with last-postmask. Scaffolds  
465 were considered to represent allelic variants in the assembly if the overlap exceeded 25% of  
466 sequence length after repeat masking, and with sequence identity > 80% to other longer  
467 scaffolds.

#### 468 ***Anchoring scaffolds to Populus trichocarpa***

469 Pairwise alignments between *P. trichocarpa* v10.1 (downloaded from PopGenie v3 [56]) and  
470 our *S. viminalis* assembly were generated from repeat-masked genomic sequence using  
471 LAST v926 [100]. We first prepared an index of the poplar genome using the sensitive DNA  
472 seeding MAM4 [101], using the masking repeat option -cR11 during alignment. A suitable

473 substitution and gap frequencies matrix was then determined with last-train, using  
474 parameters --revsym --matsym --gapsym -C2. Alignments were made with lastal, using the  
475 parameters -m100 -C2 followed by last-split -m1 to find 1-to-many willow-poplar  
476 orthologous matches. Finally, alignments that were composed primarily of masked  
477 sequence were discarded with last-postmask. One-to-one willow-poplar alignments were  
478 made by swapping both sequences and repeating the orthology search as above.

479 Neighboring alignments with <10 kb gap lengths were linked into a single path and the  
480 longest tiling path was used to assign scaffolds to poplar chromosomes. Forward or reverse  
481 scaffold orientation relative to poplar chromosomes was similarly obtained requiring that  
482 the total length of one alignment direction was >70% compared to the other orientation,  
483 otherwise the original orientation was kept. If the longest tiling path for a particular scaffold  
484 did not agree with its overall alignment path on the poplar chromosome, the scaffold was  
485 marked as unlocalized.

#### 486 ***Preprocessing of Illumina reads***

487 Whole-genome DNA sequencing reads were quality assessed with FastQC v0.11.5 [102] and  
488 preprocessed with BBTools v37.02 “bbduk” [103] to remove adapter sequences, trim  
489 regions with average quality scores below Q10 from both ends of reads and to filter out  
490 reads aligning to PhiX-174 genome (a commonly used spike-in control in Illumina  
491 sequencing runs). After filtering, read-pairs were excluded from downstream analyses if  
492 either read had an average quality score <Q20 or was <50 bases in length. The same criteria  
493 of quality assessment and filtering were used for RNA-seq data.

#### 494 ***Coverage and polymorphism analysis***

495 Alignments to the genome assembly were performed with BWA v0.7.15-r1140 using the  
496 MEM [104] algorithm and default options. General processing of SAM/BAM files was  
497 performed with SAMtools v1.6 [105] and duplicated reads were flagged with biobambam  
498 v2.0.72 [106] after alignment. Per-site coverage was computed with the SAMtools depth  
499 command after filtering out reads with mapping quality  $\geq$  Q3 that map to multiple locations,  
500 reads with secondary alignments and duplicated reads. We then calculated the effective  
501 coverage value per scaffold and in non-overlapping windows of 10 kb, as the mean per site  
502 coverage of every site in that class. To account for differences in the overall coverage  
503 between individuals, the coverage data were normalized for the median coverage value of  
504 each individual in the respective class.

505 Polymorphism analyses were conducted using the same filters as above. Read alignments  
506 were then converted to nucleotide profiles with the sam2pro program of mlRho [107]. Only  
507 sites with a per-site coverage  $\geq$ 5 and a SNP called for bi-allelic sites with a minor allele  
508 frequency  $\geq$ 30% within an individual were analysed. The average SNP density per scaffold,  
509 and window, was calculated as the number of SNPs divided by the number of sites that  
510 passed the coverage threshold of  $\geq$ 5 for the respective class.

511 In order to avoid infinitely high numbers associated with  $\log_2 0$  when calculating the  $\log_2$   
512 difference of coverage or SNP density between females and males, we added a small  
513 number (0.1) to each value. The 95% confidence intervals for the sliding window  
514 distributions were estimated from the mean bootstrap values with resampling of 1,000  
515 random sets of 25 windows from autosomes. We excluded the entirety of chromosome 15  
516 (the sex chromosome), including the PAR, in the bootstrapping procedure to avoid potential  
517 linkage effects resulting from the SDR.

518 To identify potentially W-linked scaffolds in the assembly, we proceeded as above and  
519 calculated the  $\log_2$  F:M coverage differences for each scaffold. All scaffolds where the  
520 normalized female coverage was <10% of the normalized whole-genome coverage were  
521 excluded. This is a conservative approach because of the difficulty associated with mapping  
522 to highly repetitive potential W-linked scaffolds. These scaffolds are therefore likely to  
523 remain undetected. Scaffolds were considered W-linked if the  $\log_2$  F:M coverage difference  
524 was >95% the genome average.

### 525 ***Quantification of gene expression***

526 Preprocessed RNA-seq reads [49, 55] were filtered for rRNA using Bowtie v2.3.2 [108] and  
527 the SILVA release 128 database of LSU and SSU NR99 rRNAs [109]. Filtered reads were then  
528 aligned to the reference assembly using HISAT2 v2.1.0 [110] with options --no-mixed --no-  
529 discordant. The resulting alignments for each library were sorted and merged by individual  
530 and by tissue (catkin and leaves) with SAMtools v1.6 [105]. Read counting per gene was  
531 performed using the count command of HTSeq [111] and reads per kilobase mapped (rpkm)  
532 expression values were calculated with edgeR [112]. Only genes with an rpkm  $\geq 1$  in at least  
533 one sample were considered in further analyses.

### 534 ***Annotation lift-over to 10x Genomics diploid assemblies***

535 Our reference genome annotation was transferred independently for each of the inferred  
536 haplotypes derived from our 10x Genomics de-novo assemblies of female and male  
537 genomes using UCSC Genome Browser's utilities [113]. First, a pairwise alignment between  
538 each haplotype and the non-redundant reference genome was generated as described  
539 above with LAST v926 [100]. Alignments were then converted into a series of syntenic  
540 chains and nets, tuned for more divergent genomes (axtChain -linearGap=loose), using the



541 same scoring matrix generated during the LAST alignments. Finally, annotations were  
542 moved to the haplotype assemblies using the liftOver utility with a minimum 75% ratio of  
543 mapped bases between features. Only the longest isoform of each gene was considered in  
544 the lift-over. With this approach, we transferred ~25,159 genes per diploid haplotype or  
545 ~80% of the complete annotation.

546 We further attempted to recover additional genes not lifted initially by aligning each gene  
547 individually back to the haplotype assemblies with BLAT v170523 [114], (-minIdentity=30 -  
548 minScore=12 -stepSize=5 -repMatch=2253 -extendThroughN), keeping the highest scoring  
549 alignment for each query. In order to avoid potential problems caused by the BLAT  
550 alignment of paralogous sequences, we counted the average number of haplotypes aligned  
551 to each reference gene (for a fully phased diploid region we expect 2 haplotypes). These  
552 counts were then bootstrapped with 1,000 iterations all alignments for which the haplotype  
553 coverage was below the lower bootstrap 95% confidence interval (~1.6X coverage) were  
554 excluded. This procedure recovered an average of 364 additional genes per haplotype.

### 555 ***Divergence analysis of diploid genotypes***

556 We calculated rates of divergence at synonymous ( $d_s$ ) and non-synonymous ( $d_N$ ) sites  
557 between the coding sequences of diploid genotypes for each sex separately. Only sequences  
558 with a valid start codon, without internal stop codons and with a minimum sequence length  
559 of 120 bases were analysed. After this initial filter, pairwise alignments for the two  
560 haplotypes were obtained with PRANK v140603 [115] and  $d_s$  and  $d_N$  estimates were  
561 calculated using the method of Yang and Nielsen [116] as implemented in the yn00 program  
562 of PAML v4.9h [117]. Pairwise comparisons with  $d_s > 0.2$  were excluded, thereby avoiding  
563 the incorrect assignment of orthologs.

564 **Phylogenetic analysis**

565 We use gene trees to determine the relative age of recombination suppression for the  
566 haplotypes in each identified sex chromosome strata. In addition to our non-redundant *S.*  
567 *viminalis* genome, coding sequences for *S. suchowensis* v4.1 and *P. trichocarpa* v10.1 were  
568 obtained from PopGenie v3 [56] and sequences for *S. purpurea* v1.0 were obtained from  
569 Phytozome v12 [118]. Only the longest transcripts were considered. We first use the  
570 Conditional Reciprocal Best BLAST method [119], with a BLAST e-value cut-off  $< 1 \times 10^{-5}$ , to  
571 identify 14,255 one to one orthologs across all four species (*S. viminalis*, *S. suchowensis*, *S.*  
572 *purpurea* and *P. trichocarpa*). For each ortholog group, we searched for the *S. viminalis*  
573 homolog in the lifted annotation of the female and male phased diploid assemblies and  
574 aligned all species' sequences with MAFFT v7.313 [120]. Aligned columns with  $> 40\%$  gaps  
575 and taxa with  $> 40\%$  of missing data were removed. Maximum likelihood phylogenetic trees  
576 were obtained with RAxML v8.2.12 [121] using the rapid bootstrap algorithm with 100  
577 bootstraps and the GTRGAMMA model of sequence evolution. Trees were rooted on the *P.*  
578 *trichocarpa* branch and were only considered if the two female haplotypes were present.  
579 Phylogenetic tree analyses were performed with ETE3 [122].

580

581 **Data accessibility**

582 Genome sequencing data and annotation generated for this study have all been deposited  
583 in EBI's ENA (<https://www.ebi.ac.uk/ena>) under project number PRJEB31619. IPython  
584 notebooks and additional data necessary to reproduce the main figures are available from  
585 Dryad Digital Repository doi:XXXXXX.

586

587 **Acknowledgments**

588 This work was funded by the European Research Council (grant agreements 260233 and  
589 680951) to JEM. JEM also gratefully acknowledges further support from a Royal Society  
590 Wolfson Merit Award and a Canada 150 Research Chair. We acknowledge the use of the  
591 University College London Legion High Performance Computing Facility (Legion@UCL), and  
592 associated support services, in the completion of this work. Sequencing and annotation  
593 were funded by the Swedish Energy Agency, grant 30599-5 and from the Swedish Research  
594 Council for Environment, Agricultural Sciences and Spatial Planning (Formas) grant 2016-  
595 20031. We also acknowledge the support provided by NBIS (National Bioinformatics  
596 Infrastructure Sweden). Sequencing was performed by the National Genomics Infrastructure  
597 (NGI) Sweden at Science for Life Laboratory. NGI is supported by the Swedish Research  
598 Council and the Knut and Alice Wallenberg Foundation, which supported AC, BN, and EP-W  
599 during the course of this work. We thank A. Corral-Lopez, I Darolti, B. Furman, D. Metzger,  
600 B. Sandkam, J. Shu and W. van der Bijl for helpful comments and suggestions.

601

602 **References**

603

- 604 1. Bachtrog D, Mank JE, Peichel CL, Kirkpatrick M, Otto SP, Ashman TL, et al. Sex  
605 determination: why so many ways of doing it. *PLoS Biology*. 2014;12: e1001899.
- 606 2. Beukeboom L, Perrin N. *The Evolution of Sex Determination*. Oxford University Press;  
607 2014.
- 608 3. Bergero R, Charlesworth D. The evolution of restricted recombination in sex  
609 chromosomes. *Trends in Ecology & Evolution*. 2009;24: 94–102.
- 610 4. Muller HJ. Genetic variability, twin hybrids and constant hybrids, in a case of balanced  
611 lethal factors. *Genetics*. 1918;3: 422–499.
- 612 5. Bachtrog D, Kirkpatrick M, Mank JE, McDaniel SF, Pires JC, Rice W, et al. Are all sex  
613 chromosomes created equal. *Trends in Genetics*. 2011;27: 350–357.
- 614 6. Bachtrog D. Y-chromosome evolution: emerging insights into processes of Y-  
615 chromosome degeneration. *Nature Reviews. Genetics*. 2013;14: 113–124.
- 616 7. Charlesworth B, Charlesworth D. The degeneration of Y chromosomes. *Philosophical*  
617 *transactions of the Royal Society of London. Series B, Biological sciences*. 2000;355:  
618 1563–1572.

- 619 8. Papadopulos AS, Chester M, Ridout K, Filatov DA. Rapid Y degeneration and dosage  
620 compensation in plant sex chromosomes. *Proceedings of the National Academy of*  
621 *Sciences of the United States of America*. 2015;112: 13021–13026.
- 622 9. Bergero R, Forrest A, Kamau E, Charlesworth D. Evolutionary strata on the X  
623 chromosomes of the dioecious plant *Silene latifolia*: evidence from new sex-linked  
624 genes. *Genetics*. 2007;175: 1945–1954.
- 625 10. Lahn BT, Page DC. Four evolutionary strata on the human X chromosome. *Science*.  
626 1999;286: 964–967.
- 627 11. Roesti M, Kueng B, Moser D, Berner D. The genomics of ecological vicariance in  
628 threespine stickleback fish. *Nature Communications*. 2015;6: 8767.
- 629 12. Vicoso B, Emerson JJ, Zektser Y, Mahajan S, Bachtrog D. Comparative sex chromosome  
630 genomics in snakes: differentiation, evolutionary strata, and lack of global dosage  
631 compensation. *PLoS Biology*. 2013;11: e1001643.
- 632 13. Wright AE, Harrison PW, Montgomery SH, Pointer MA, Mank JE. Independent stratum  
633 formation on the avian sex chromosomes reveals inter-chromosomal gene conversion  
634 and predominance of purifying selection on the W chromosome. *Evolution*. 2014;68:  
635 3281–3295.
- 636 14. Bergero R, Qiu S, Forrest A, Borthwick H, Charlesworth D. Expansion of the pseudo-  
637 autosomal region and ongoing recombination suppression in the *Silene latifolia* sex  
638 chromosomes. *Genetics*. 2013;194: 673–686.
- 639 15. Chibalina MV, Filatov DA. Plant Y chromosome degeneration is retarded by haploid  
640 purifying selection. *Current Biology*. 2011;21: 1475–1479.
- 641 16. Natri HM, Shikano T, Merilä J. Progressive recombination suppression and  
642 differentiation in recently evolved neo-sex chromosomes. *Molecular Biology and*  
643 *Evolution*. 2013;30: 1131–1144.
- 644 17. Nicolas M, Marais G, Hykelova V, Janousek B, Laporte V, Vyskot B, et al. A gradual  
645 process of recombination restriction in the evolutionary history of the sex  
646 chromosomes in dioecious plants. *PLoS Biology*. 2005;3: e4.
- 647 18. Charlesworth D, Charlesworth B, Marais G. Steps in the evolution of heteromorphic  
648 sex chromosomes. *Heredity*. 2005;95: 118–128.
- 649 19. Dobzhansky T. Genetics of natural populations; experiments on chromosomes of  
650 *Drosophila pseudoobscura* from different geographic regions. *Genetics*. 1948;33: 588–  
651 602.
- 652 20. Dobzhansky T. *Genetics of the Evolutionary Process*. Columbia University Press; 1970.
- 653 21. Dobzhansky T, Pavlovsky O. Indeterminate outcome of certain experiments on  
654 *Drosophila* populations. *Evolution*. 1953;7: 198–210.
- 655 22. Dobzhansky T, Pavlovsky O. Interracial hybridization and breakdown of coadapted  
656 gene complexes in *Drosophila paulistorum* and *Drosophila willistoni*. *Proceedings of*  
657 *the National Academy of Sciences of the United States of America*. 1958;44: 622–629.
- 658 23. Bull JJ. *Evolution of Sex: Determining Mechanisms*. Benjamin-Cummings Publishing  
659 Co., Subs. of Addison Wesley Longman, US; 1983.
- 660 24. Fisher RA. The evolution of dominance. *Biological Reviews*. 1931;6: 345–368.
- 661 25. Rice WR. Evolution of the Y sex chromosome in animals. *BioScience*. 1996;46: 331–  
662 343.
- 663 26. Wright AE, Dean R, Zimmer F, Mank JE. How to make a sex chromosome. *Nature*  
664 *Communications*. 2016;7: 12087.

- 665 27. Iijima T, Kajitani R, Komata S, Lin C-P, Sota T, Itoh T, et al. Parallel evolution of Batesian  
666 mimicry supergene in two *Papilio* butterflies, *P. polytes* and *P. memnon*. *Science*  
667 *Advances*. 2018;4: eaao5416.
- 668 28. Joron M, Frezal L, Jones RT, Chamberlain NL, Lee SF, Haag CR, et al. Chromosomal  
669 rearrangements maintain a polymorphic supergene controlling butterfly mimicry.  
670 *Nature*. 2011;477: 203–206.
- 671 29. Küpper C, Stocks M, Risse JE, Dos Remedios N, Farrell LL, McRae SB, et al. A supergene  
672 determines highly divergent male reproductive morphs in the ruff. *Nature Genetics*.  
673 2016;48: 79–83.
- 674 30. Lamichhaney S, Fan G, Widemo F, Gunnarsson U, Thalmann DS, Hoepfner MP, et al.  
675 Structural genomic changes underlie alternative reproductive strategies in the ruff  
676 (*Philomachus pugnax*). *Nature Genetics*. 2016;48: 84–88.
- 677 31. Wang J, Wurm Y, Nipitwattanaphon M, Riba-Grognuz O, Huang YC, Shoemaker D, et al.  
678 A Y-like social chromosome causes alternative colony organization in fire ants. *Nature*.  
679 2013;493: 664–668.
- 680 32. Dufresnes C, Bertholet Y, Wassef J, Ghali K, Savary R, Pasteur B, et al. Sex-chromosome  
681 differentiation parallels postglacial range expansion in European tree frogs (*Hyla*  
682 *arborea*). *Evolution*. 2014;68: 3445–3456.
- 683 33. Reichwald K, Petzold A, Koch P, Downie BR, Hartmann N, Pietsch S, et al. Insights into  
684 sex chromosome evolution and aging from the genome of a short-lived fish. *Cell*.  
685 2015;163: 1527–1538.
- 686 34. Rodrigues N, Vuille Y, Loman J, Perrin N. Sex-chromosome differentiation and ‘sex  
687 races’ in the common frog (*Rana temporaria*). *Proceedings. Biological sciences*.  
688 2015;282: 20142726.
- 689 35. Wright AE, Darolti I, Bloch NI, Oostra V, Sandkam B, Buechel SD, et al. Convergent  
690 recombination suppression suggests role of sexual selection in guppy sex chromosome  
691 formation. *Nature Communications*. 2017;8: 14251.
- 692 36. Filatov DA. Homomorphic plant sex chromosomes are coming of age. *Molecular*  
693 *Ecology*. 2015;24: 3217–3219.
- 694 37. Geraldine A, Hefer CA, Capron A, Kolosova N, Martinez-Nuñez F, Soolanayakanahally  
695 RY, et al. Recent Y chromosome divergence despite ancient origin of dioecy in poplars  
696 (*Populus*). *Molecular Ecology*. 2015;24: 3243–3256.
- 697 38. Ming R, Bendahmane A, Renner SS. Sex chromosomes in land plants. *Annual Review of*  
698 *Plant Biology*. 2011;62: 485–514.
- 699 39. Veltsos P, Cossard G, Beaudoin E, Beydon G, Savova Bianchi D, Roux C, et al. Size and  
700 content of the sex-determining region of the Y Chromosome in dioecious *Mercurialis*  
701 *annua*, a plant with homomorphic sex chromosomes. *Genes*. 2018;9:
- 702 40. Akagi T, Henry IM, Tao R, Comai L. A Y-chromosome-encoded small RNA acts as a sex  
703 determinant in persimmons. *Science*. 2014;346: 646–650.
- 704 41. Harkess A, Zhou J, Xu C, Bowers JE, Van der Hulst R, Ayyampalayam S, et al. The  
705 asparagus genome sheds light on the origin and evolution of a young Y chromosome.  
706 *Nature Communications*. 2017;8: 1279.
- 707 42. Russell JR, Pannell JR. Sex determination in dioecious *Mercurialis annua* and its close  
708 diploid and polyploid relatives. *Heredity*. 2015;114: 262–271.
- 709 43. Tennessen JA, Wei N, Straub SCK, Govindarajulu R, Liston A, Ashman TL. Repeated  
710 translocation of a gene cassette drives sex-chromosome turnover in strawberries. *PLoS*  
711 *Biology*. 2018;16: e2006062.

- 712 44. Torres MF, Mathew LS, Ahmed I, Al-Azwani IK, Krueger R, Rivera-Nuñez D, et al. Genus-  
713 wide sequencing supports a two-locus model for sex-determination in Phoenix. *Nature*  
714 *Communications*. 2018;9: 443.
- 715 45. Wang J, Na JK, Yu Q, Gschwend AR, Han J, Zeng F, et al. Sequencing papaya X and Yh  
716 chromosomes reveals molecular basis of incipient sex chromosome evolution.  
717 *Proceedings of the National Academy of Sciences of the United States of America*.  
718 2012;109: 13710–13715.
- 719 46. Sandler G, Beaudry FEG, Barrett SCH, Wright SI. The effects of haploid selection on Y  
720 chromosome evolution in two closely related dioecious plants. *Evolution Letters*.  
721 2018;2: 368–377.
- 722 47. Ridout KE, Veltsos P, Muyle A, Emery O, Rastas P, Marais GAB, et al. Hallmarks of early  
723 sex-chromosome evolution in the dioecious plant *Mercurialis annua* revealed by de  
724 novo genome assembly, genetic mapping and transcriptome analysis. *bioRxiv*. 2017
- 725 48. Pucholt P, Rönnerberg-Wästljung AC, Berlin S. Single locus sex determination and female  
726 heterogamety in the basket willow (*Salix viminalis* L.). *Heredity*. 2015;114: 575–583.
- 727 49. Pucholt P, Wright AE, Conze LL, Mank JE, Berlin S. Recent sex chromosome divergence  
728 despite ancient dioecy in the willow *Salix viminalis*. *Molecular Biology and Evolution*.  
729 2017;34: 1991–2001.
- 730 50. Hou J, Ye N, Zhang D, Chen Y, Fang L, Dai X, et al. Different autosomes evolved into sex  
731 chromosomes in the sister genera of *Salix* and *Populus*. *Scientific Reports*. 2015;5:  
732 9076.
- 733 51. Berlin S, Trybush SO, Fogelqvist J, Gyllenstrand N, Hallingbäck HR, Åhman I, et al.  
734 Genetic diversity, population structure and phenotypic variation in European *Salix*  
735 *viminalis* L. (Salicaceae). *Tree Genetics & Genomes*. 2014;10: 1595–1610.
- 736 52. Pucholt P, Hallingbäck HR, Berlin S. Allelic incompatibility can explain female biased  
737 sex ratios in dioecious plants. *BMC Genomics*. 2017;18: 251.
- 738 53. Berlin S, Fogelqvist J, Lascoux M, Lagercrantz U, Rönnerberg-Wästljung AC.  
739 Polymorphism and divergence in two willow species, *Salix viminalis* L. and *Salix*  
740 *schwerinii* E. Wolf. *G3*. 2011;1: 387–400.
- 741 54. Holt C, Yandell M. MAKER2: an annotation pipeline and genome-database  
742 management tool for second-generation genome projects. *BMC Bioinformatics*.  
743 2011;12: 491.
- 744 55. Darolti I, Wright AE, Pucholt P, Berlin S, Mank JE. Slow evolution of sex-biased genes in  
745 the reproductive tissue of the dioecious plant *Salix viminalis*. *Molecular Ecology*.  
746 2018;27: 694–708.
- 747 56. Sjödin A, Street NR, Sandberg G, Gustafsson P, Jansson S. The *Populus* Genome  
748 Integrative Explorer (PopGenIE): a new resource for exploring the *Populus* genome.  
749 *The New Phytologist*. 2009;182: 1013–1025.
- 750 57. Vicoso B, Bachrog D. Reversal of an ancient sex chromosome to an autosome in  
751 *Drosophila*. *Nature*. 2013;499: 332–335.
- 752 58. Tuskan GA, Difazio S, Jansson S, Bohlmann J, Grigoriev I, Hellsten U, et al. The genome  
753 of black cottonwood, *Populus trichocarpa* (Torr. & Gray). *Science*. 2006;313: 1596–  
754 1604.
- 755 59. Zhou R, Macaya-Sanz D, Rodgers-Melnick E, Carlson CH, Gouker FE, Evans LM, et al.  
756 Characterization of a large sex determination region in *Salix purpurea* L. (Salicaceae).  
757 *Molecular Genetics and Genomics*. 2018211.

- 758 60. Burt A, Bell G, Harvey PH. Sex differences in recombination. *Journal of Evolutionary*  
759 *Biology*. 1991;4: 259–277.
- 760 61. Kong A, Thorleifsson G, Gudbjartsson DF, Masson G, Sigurdsson A, Jonasdottir A, et al.  
761 Fine-scale recombination rate differences between sexes, populations and individuals.  
762 *Nature*. 2010;467: 1099–1103.
- 763 62. Lenormand T. The evolution of sex dimorphism in recombination. *Genetics*. 2003;163:  
764 811–822.
- 765 63. Lenormand T, Dutheil J. Recombination difference between sexes: a role for haploid  
766 selection. *PLoS Biology*. 2005;3: e63.
- 767 64. Flot JF, Hespels B, Li X, Noel B, Arkhipova I, Danchin EG, et al. Genomic evidence for  
768 ameiotic evolution in the bdelloid rotifer *Adineta vaga*. *Nature*. 2013;500: 453–457.
- 769 65. Sun Y, Svedberg J, Hiltunen M, Corcoran P, Johannesson H. Large-scale suppression of  
770 recombination predates genomic rearrangements in *Neurospora tetrasperma*. *Nature*  
771 *Communications*. 2017;8: 1140.
- 772 66. Branco S, Badouin H, Rodríguez de la Vega RC, Gouzy J, Carpentier F, Aguilera G, et al.  
773 Evolutionary strata on young mating-type chromosomes despite the lack of sexual  
774 antagonism. *Proceedings of the National Academy of Sciences of the United States of*  
775 *America*. 2017;114: 7067–7072.
- 776 67. Branco S, Carpentier F, Rodríguez de la Vega RC, Badouin H, Snirc A, Le Prieur S, et al.  
777 Multiple convergent supergene evolution events in mating-type chromosomes. *Nature*  
778 *communications*. 2018;9: 2000.
- 779 68. Soh YQ, Alföldi J, Pyntikova T, Brown LG, Graves T, Minx PJ, et al. Sequencing the  
780 mouse Y chromosome reveals convergent gene acquisition and amplification on both  
781 sex chromosomes. *Cell*. 2014;159: 800–813.
- 782 69. Tomaszewicz M, Rangavittal S, Cechova M, Campos Sanchez R, Fescemyer HW, Harris  
783 R, et al. A time- and cost-effective strategy to sequence mammalian Y Chromosomes:  
784 an application to the de novo assembly of gorilla Y. *Genome Research*. 2016;26: 530–  
785 540.
- 786 70. Ben-Aroya S, Mieczkowski PA, Petes TD, Kupiec M. The compact chromatin structure  
787 of a Ty repeated sequence suppresses recombination hotspot activity in  
788 *Saccharomyces cerevisiae*. *Molecular cell*. 2004;15: 221–231.
- 789 71. He L, Dooner HK. Haplotype structure strongly affects recombination in a maize  
790 genetic interval polymorphic for Helitron and retrotransposon insertions. *Proceedings*  
791 *of the National Academy of Sciences of the United States of America*. 2009;106: 8410–  
792 8416.
- 793 72. Sasaki M, Tischfield SE, van Overbeek M, Keeney S. Meiotic recombination initiation in  
794 and around retrotransposable elements in *Saccharomyces cerevisiae*. *PLoS Genetics*.  
795 2013;9: e1003732.
- 796 73. Hough J, Hollister JD, Wang W, Barrett SC, Wright SI. Genetic degeneration of old and  
797 young Y chromosomes in the flowering plant *Rumex hastatulus*. *Proceedings of the*  
798 *National Academy of Sciences of the United States of America*. 2014;111: 7713–7718.
- 799 74. Martin H, Carpentier F, Gallina S, Godé C, Schmitt E, Muyle A, et al. Evolution of young  
800 sex chromosomes in two dioecious sister plant species with distinct sex determination  
801 systems. *Genome Biology and Evolution*. 2019;11: 350–361.
- 802 75. Muyle A, Käfer J, Zemp N, Mousset S, Picard F, Marais GA. SEX-DETECTOR: a  
803 probabilistic approach to study sex chromosomes in non-model organisms. *Genome*  
804 *Biology and Evolution*. 2016;8: 2530–2543.

- 805 76. Muyle A, Zemp N, Fruchard C, Cegan R, Vrana J, Deschamps C, et al. Genomic  
806 imprinting mediates dosage compensation in a young plant XY system. *Nature Plants*.  
807 2018;4: 677–680.
- 808 77. Chandler JW. Floral meristem initiation and emergence in plants. *Cellular and*  
809 *Molecular Life Sciences*. 2012;69: 3807–3818.
- 810 78. Gerashchenkov GA, Rozhnova NA. The involvement of phytohormones in the plant sex  
811 regulation. *Russian Journal of Plant Physiology*. 2013;60: 597–610.
- 812 79. Somssich M, Je BI, Simon R, Jackson D. CLAVATA-WUSCHEL signaling in the shoot  
813 meristem. *Development*. 2016;143: 3238.
- 814 80. Kazama Y, Nishihara K, Bergero R, Fujiwara MT, Abe T, Charlesworth D, et al. SIWUS1;  
815 an X-linked gene having no homologous Y-linked copy in *Silene latifolia*. *G3*. 2012;2:  
816 1269.
- 817 81. Cronk QC, Needham I, Rudall PJ. Evolution of catkins: inflorescence morphology of  
818 selected Salicaceae in an evolutionary and developmental context. *Frontiers in Plant*  
819 *Science*. 2015;6: 1030.
- 820 82. Charlesworth B, Charlesworth D. A model for the evolution of dioecy and gynodioecy.  
821 *The American Naturalist*. 1978;112: 975–997.
- 822 83. Boualem A, Troadec C, Camps C, Lemhemdi A, Morin H, Sari MA, et al. A cucurbit  
823 androecy gene reveals how unisexual flowers develop and dioecy emerges. *Science*.  
824 2015;350: 688–691.
- 825 84. Hallingbäck HR, Fogelqvist J, Powers SJ, Turrion-Gomez J, Rossiter R, Amey J, et al.  
826 Association mapping in *Salix viminalis* L. (Salicaceae) – identification of candidate  
827 genes associated with growth and phenology. *Global change biology*. *Bioenergy*.  
828 2016;8: 670–685.
- 829 85. Chin CS, Peluso P, Sedlazeck FJ, Nattestad M, Concepcion GT, Clum A, et al. Phased  
830 diploid genome assembly with single-molecule real-time sequencing. *Nature methods*.  
831 2016;13: 1050–1054.
- 832 86. Walker BJ, Abeel T, Shea T, Priest M, Abouelliel A, Sakthikumar S, et al. Pilon: an  
833 integrated tool for comprehensive microbial variant detection and genome assembly  
834 improvement. *PloS One*. 2014;9: e112963.
- 835 87. Weisenfeld NI, Kumar V, Shah P, Church DM, Jaffe DB. Direct determination of diploid  
836 genome sequences. *Genome Research*. 2017;27: 757–767.
- 837 88. Chakraborty M, Baldwin-Brown JG, Long AD, Emerson JJ. Contiguous and accurate de  
838 novo assembly of metazoan genomes with modest long read coverage. *Nucleic Acids*  
839 *Research*. 2016;44: e147.
- 840 89. Warren RL, Yang C, Vandervalk BP, Behsaz B, Lagman A, Jones SJ, et al. LINKS: Scalable,  
841 alignment-free scaffolding of draft genomes with long reads. *GigaScience*. 2015;4: 35.
- 842 90. Magrane M, Consortium U. UniProt Knowledgebase: a hub of integrated protein data.  
843 *Database*. 2011;2011: bar009.
- 844 91. Stanke M, Keller O, Gunduz I, Hayes A, Waack S, Morgenstern B. AUGUSTUS: ab initio  
845 prediction of alternative transcripts. *Nucleic Acids Research*. 2006;34: W435–9.
- 846 92. Ter-Hovhannisyan V, Lomsadze A, Chernoff YO, Borodovsky M. Gene prediction in  
847 novel fungal genomes using an ab initio algorithm with unsupervised training. *Genome*  
848 *Research*. 2008;18: 1979–1990.
- 849 93. Korf I. Gene finding in novel genomes. *BMC Bioinformatics*. 2004;5: 59.
- 850 94. Smit AFA, Hubley R. RepeatModeler Open-1.0. 2015. Available from:  
851 <http://www.repeatmasker.org>.



- 852 95. Smit AFA, Hubley R, Green P. RepeatMasker Open-4.0. 2015. Available from:  
853 <http://www.repeatmasker.org>.
- 854 96. Yandell M. Comparative Genomics Library - RepeatRunner. 2006. Available from:  
855 <http://www.yandell-lab.org/software/repeatrunner.html>.
- 856 97. Lowe TM, Eddy SR. tRNAscan-SE: a program for improved detection of transfer RNA  
857 genes in genomic sequence. *Nucleic Acids Research*. 1997;25: 955–964.
- 858 98. Nawrocki EP, Eddy SR. Infernal 1.1: 100-fold faster RNA homology searches.  
859 *Bioinformatics*. 2013;29: 2933–2935.
- 860 99. Nawrocki EP, Burge SW, Bateman A, Daub J, Eberhardt RY, Eddy SR, et al. Rfam 12.0:  
861 updates to the RNA families database. *Nucleic Acids Research*. 2015;43: D130–7.
- 862 100. Kiełbasa SM, Wan R, Sato K, Horton P, Frith MC. Adaptive seeds tame genomic  
863 sequence comparison. *Genome Research*. 2011;21: 487–493.
- 864 101. Frith MC, Noé L. Improved search heuristics find 20,000 new alignments between  
865 human and mouse genomes. *Nucleic Acids Research*. 2014;42: e59.
- 866 102. Andrews S. FastQC: a quality control tool for high throughput sequence data. 2016.  
867 Available from: <http://www.bioinformatics.babraham.ac.uk/projects/fastqc>.
- 868 103. Bushnell B. BBMap short read aligner, and other bioinformatic tools. 2016. Available  
869 from: <https://jgi.doe.gov/data-and-tools/bbtools/bb-tools-user-guide/>.
- 870 104. Li H. Aligning sequence reads, clone sequences and assembly contigs with BWA-MEM.  
871 arXiv. 2013;1303.3997:
- 872 105. Li H, Handsaker B, Wysoker A, Fennell T, Ruan J, Homer N, et al. The Sequence  
873 Alignment/Map format and SAMtools. *Bioinformatics*. 2009;25: 2078–2079.
- 874 106. Tischler G, Leonard S. biobambam: tools for read pair collation based algorithms on  
875 BAM files. *Source Code for Biology and Medicine*. 2014;9: 2078.
- 876 107. Haubold B, Pfaffelhuber P, Lynch M. mlRho - a program for estimating the population  
877 mutation and recombination rates from shotgun-sequenced diploid genomes.  
878 *Molecular Ecology*. 2010;19 Suppl 1: 277–284.
- 879 108. Langmead B, Salzberg SL. Fast gapped-read alignment with Bowtie 2. *Nature Methods*.  
880 2012;9: 357–359.
- 881 109. Quast C, Pruesse E, Yilmaz P, Gerken J, Schweer T, Yarza P, et al. The SILVA ribosomal  
882 RNA gene database project: improved data processing and web-based tools. *Nucleic  
883 Acids Research*. 2013;41: D590–6.
- 884 110. Kim D, Langmead B, Salzberg SL. HISAT: a fast spliced aligner with low memory  
885 requirements. *Nature Methods*. 2015;12: 357–360.
- 886 111. Anders S, Pyl PT, Huber W. HTSeq--a Python framework to work with high-throughput  
887 sequencing data. *Bioinformatics*. 2015;31: 166–169.
- 888 112. Robinson MD, McCarthy DJ, Smyth GK. edgeR: a Bioconductor package for differential  
889 expression analysis of digital gene expression data. *Bioinformatics*. 2010;26: 139–140.
- 890 113. Kent WJ, Baertsch R, Hinrichs A, Miller W, Haussler D. Evolution's cauldron:  
891 duplication, deletion, and rearrangement in the mouse and human genomes.  
892 *Proceedings of the National Academy of Sciences of the United States of America*.  
893 2003;100: 11484–11489.
- 894 114. Kent WJ. BLAT--the BLAST-like alignment tool. *Genome Research*. 2002;12: 656–664.
- 895 115. Löytynoja A, Goldman N. An algorithm for progressive multiple alignment of  
896 sequences with insertions. *Proceedings of the National Academy of Sciences of the  
897 United States of America*. 2005;102: 10557–10562.

- 898 116. Yang Z, Nielsen R. Estimating synonymous and nonsynonymous substitution rates  
899 under realistic evolutionary models. *Molecular Biology and Evolution*. 2000;17: 32–43.  
900 117. Yang Z. PAML 4: phylogenetic analysis by maximum likelihood. *Molecular Biology and*  
901 *Evolution*. 2007;24: 1586–1591.  
902 118. Goodstein DM, Shu S, Howson R, Neupane R, Hayes RD, Fazo J, et al. Phytozome: a  
903 comparative platform for green plant genomics. *Nucleic Acids Research*. 2012;40:  
904 D1178–86.  
905 119. Aubry S, Kelly S, Kümpers BM, Smith-Unna RD, Hibberd JM. Deep evolutionary  
906 comparison of gene expression identifies parallel recruitment of trans-factors in two  
907 independent origins of C4 photosynthesis. *PLoS Genetics*. 2014;10: e1004365.  
908 120. Katoh K, Standley DM. MAFFT multiple sequence alignment software version 7:  
909 improvements in performance and usability. *Molecular Biology and Evolution*.  
910 2013;30: 772–780.  
911 121. Stamatakis A. RAxML version 8: a tool for phylogenetic analysis and post-analysis of  
912 large phylogenies. *Bioinformatics*. 2014;30: 1312–1313.  
913 122. Huerta-Cepas J, Serra F, Bork P. ETE 3: reconstruction, analysis, and visualization of  
914 phylogenomic data. *Molecular Biology and Evolution*. 2016;33: 1635–1638.  
915  
916  
917  
918

919 **Tables**

920

921 **Table 1.** Genes on W chromosome scaffolds 148 and 211 with non-preserved synteny  
 922 relative to the homologous region on the Z chromosome. Orthologs were searched with  
 923 BLASTP using an e-value threshold of  $1 \times 10^{-3}$  and 75% minimum sequence identity.  
 924

| Scaffold | Gene              | Product                                                       | Scaffold of best ortholog (location in <i>P. trichocarpa</i> ) |
|----------|-------------------|---------------------------------------------------------------|----------------------------------------------------------------|
| 211      | ADT2              | Arogenate dehydratase/prephenate dehydratase 2, chloroplastic | 100 (Chr08)                                                    |
| 211      | 30220             | hypothetical protein                                          |                                                                |
| 211      | 30217             | hypothetical protein                                          |                                                                |
| 211      | POPTR_0012s05040g | L-Ala-D/L-amino acid epimerase                                |                                                                |
| 211      | 30210             | hypothetical protein                                          | 71 (Chr18)                                                     |
| 211      | FBA               | Fructose-bisphosphate aldolase                                | 402* (Chr15)                                                   |
| 148      | KP1_5             | Kinesin KP1                                                   | 150 (Chr15)                                                    |
| 148      | ESP3_4            | Pre-mRNA-splicing factor ATP-dependent RNA helicase DEAH1     | 127 (Chr15)                                                    |
| 148      | CDC48MEE29        | Cell division cycle protein 48 homolog                        | 47 (Chr12)                                                     |
| 148      | ESP3_2            | Pre-mRNA-splicing factor ATP-dependent RNA helicase DEAH1     | 28 (Chr15)                                                     |
| 148      | ESP3_6            | Pre-mRNA-splicing factor ATP-dependent RNA helicase DEAH1     | 127 (Chr15)                                                    |
| 148      | ARR5_2            | Two-component response regulator ARR5                         | 25 (Chr15)                                                     |
| 148      | ARR17             | Two-component response regulator ARR17                        |                                                                |
| 148      | WOX1_4            | WUSCHEL-related homeobox 1                                    | 150 (Chr15)                                                    |
| 148      | ATM_6             | Serine/threonine-protein kinase ATM                           | 25 (Chr15)                                                     |
| 148      | BADH4_2           | Betaine aldehyde dehydrogenase, chloroplastic                 | 326 (Chr12)                                                    |
| 148      | ZDS_7             | Zeta-carotene desaturase, chloroplastic/chromoplastic         | 593 (Chr15)                                                    |
| 148      | 27648             | hypothetical protein                                          |                                                                |
| 148      | CDKE-1_12         | Cyclin-dependent kinase E-1                                   | 4 (Chr01)                                                      |
| 148      | 27660             | hypothetical protein                                          |                                                                |

925

926 \* scaffold 402 was inferred as an allelic variation of scaffold 150.

927

928

929

930

931

932  
933  
934  
935  
936  
937  
938  
939  
940  
941  
942  
943  
944  
945  
946  
947  
948  
949  
950  
951  
952  
953  
954  
955  
956  
957  
958  
959  
960  
961  
962  
963  
964  
965  
966  
967  
968  
969  
970  
971  
972  
973  
974  
975  
976  
977  
978  
979  
980

## Figure legends

**Figure 1.** Identification of two evolutionary strata in the sex determination region (SDR) of the basket willow *S. viminalis*. Chromosome positions for *P. trichocarpa* and *S. viminalis* are shown in Mb with the *S. viminalis* scaffold names shown on the top. The two identified strata are shown with different hues of pink and labelled above the plot. **A)** Anchoring of *S. viminalis* scaffolds to the autosomal chromosome 15 of *P. trichocarpa*. Forward alignments are drawn in blue and reverse alignments are drawn in red. **B)**  $\log_2$  differences of normalized SNP density between *S. viminalis* females and males in non-overlapping windows of 10 kb. A moving average of 25 windows is shown in the black line. The grey shaded area corresponds to the bootstrap 95% confidence interval of the autosomal data. **C)**  $\log_2$  differences of normalized read coverage between females and males in non-overlapping windows of 10 kb. Moving average and bootstrap statistics are as in B). Values close to -1 indicate twice the coverage in males in comparison with female, thus potentially Z-linked.

**Figure 2.** Comparison of polymorphisms at synonymous ( $d_S$ ) and non-synonymous ( $d_N$ ) sites. **A)** Boxplots of  $d_S$  estimates. **B)** Boxplots of  $d_N$  estimates.  $d_S$  and  $d_N$  were calculated based on the coding sequence alignment of phased diploid haplotypes from one female and one male individuals in the genome (excluding chromosome 15), the pseudo-autosomal region (PAR), the sex-determining region (SDR) and the more divergent Stratum I. The inset plots show the quartile distributions of  $d_S$  and  $d_N$  estimates without outliers. Significant values from Mann-Whitney U-test relative to the genome are indicated with asterisks: \*  $p < 0.05$ ; \*\*  $p < 0.01$ ; \*\*\*  $p < 0.001$ .

**Figure 3.** Examples of phylogenetic trees between gametologous gene pairs in the basket willow SDR. In panels **A)** and **B)**, the W-linked copy of the female gametolog is more divergent and does not cluster with the other *S. viminalis* haplotypes, indicating that suppression of recombination in Stratum I occurred prior to *S. viminalis* speciation. In panels **C)** and **D)** the female W-linked copy clusters within the species' branch suggesting that recombination has been halted more recently. *S. viminalis* gametologs are indicated with red squares, male haplotypes are in blue. Trees were estimated by maximum likelihood. Bootstrap values  $>75\%$  are indicated with black dots on the respective nodes. The poplar (*P. trichocarpa*) ortholog was used to root the trees.

**Figure 4.** Synteny analyses of Z- and W-linked resolved haplotypes. **A)** Circular plots showing that scaffolds 148 and 211 are W-linked and align to the SDR of chromosome 15. From the outside to the center, (a) depicts the heatmap of  $\log_2$  females: males read depth in non-overlapping windows of 5 kb, (b) shows the repeat proportion in non-overlapping windows of 10 kb and (c) indicates the location of annotated genes. Links between genes were computed from the best BLASTP hits and are colour coded relative to the BLASTP alignment percent identity, with percent identity  $>80\%$  in blue and  $>90\%$  in red. Positions are shown in kb. **B)** and **C)** reveal a highly conserved synteny between Z- and W-linked scaffolds.

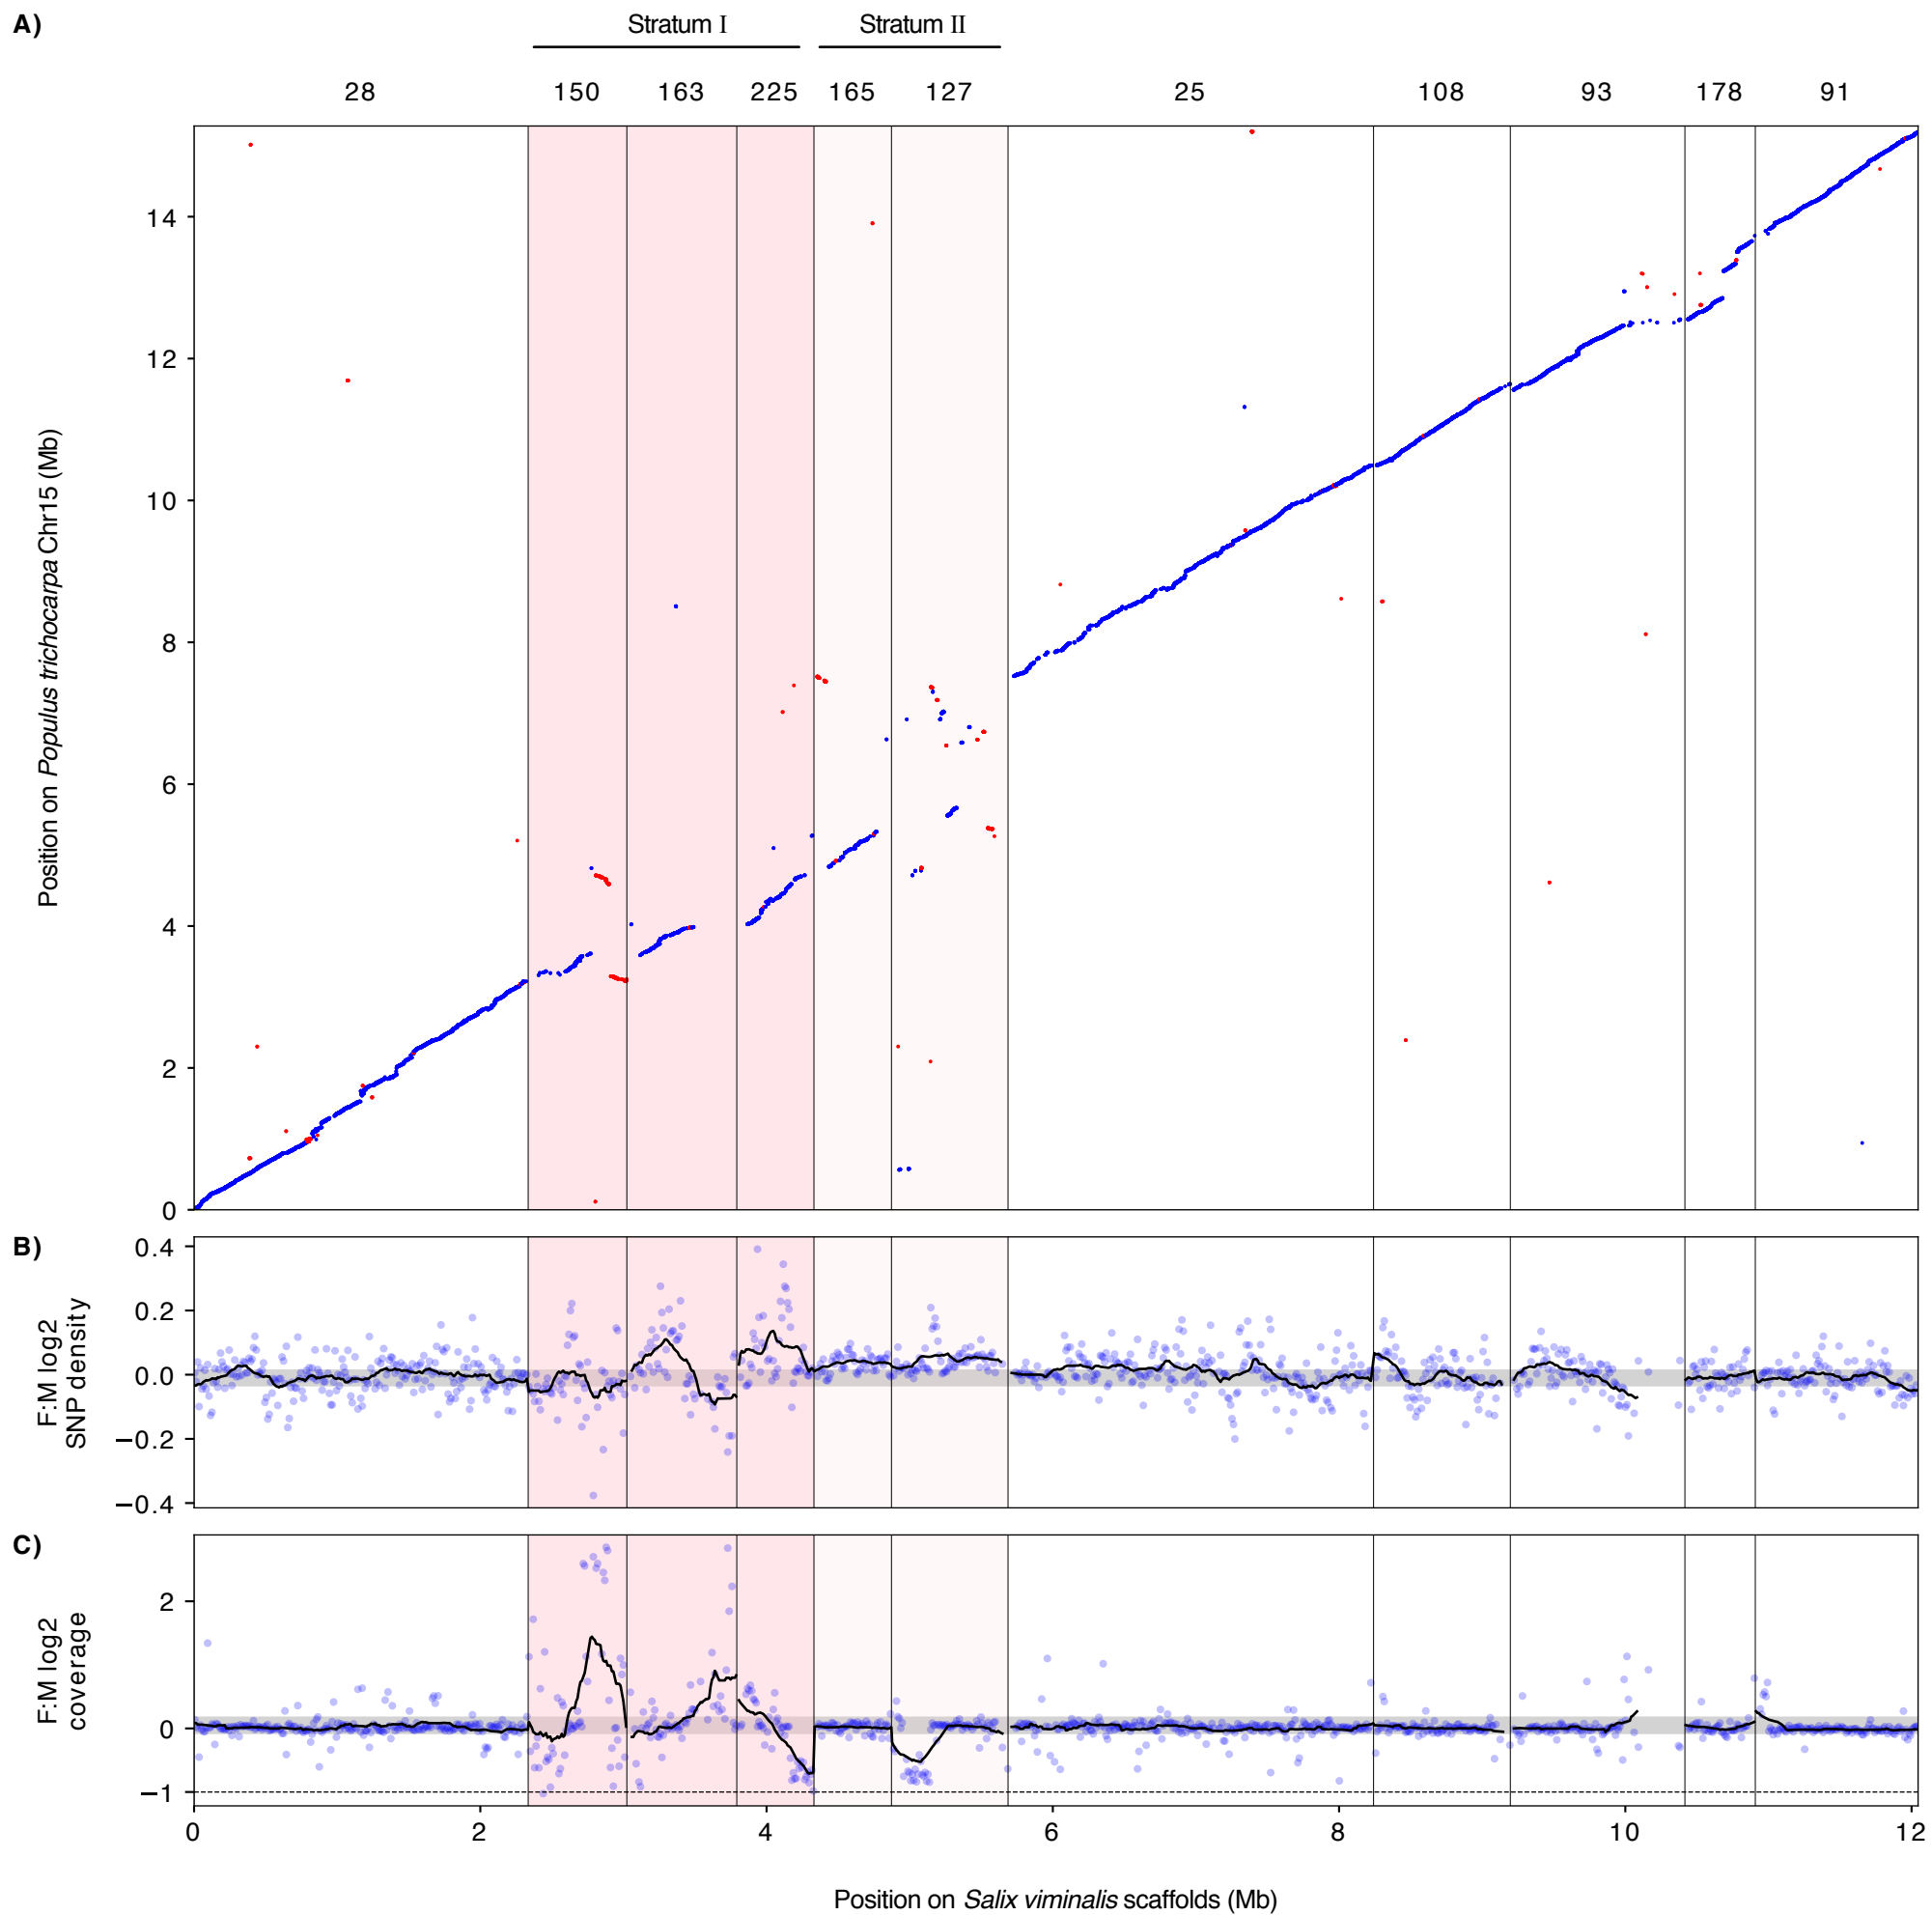

Figure 2

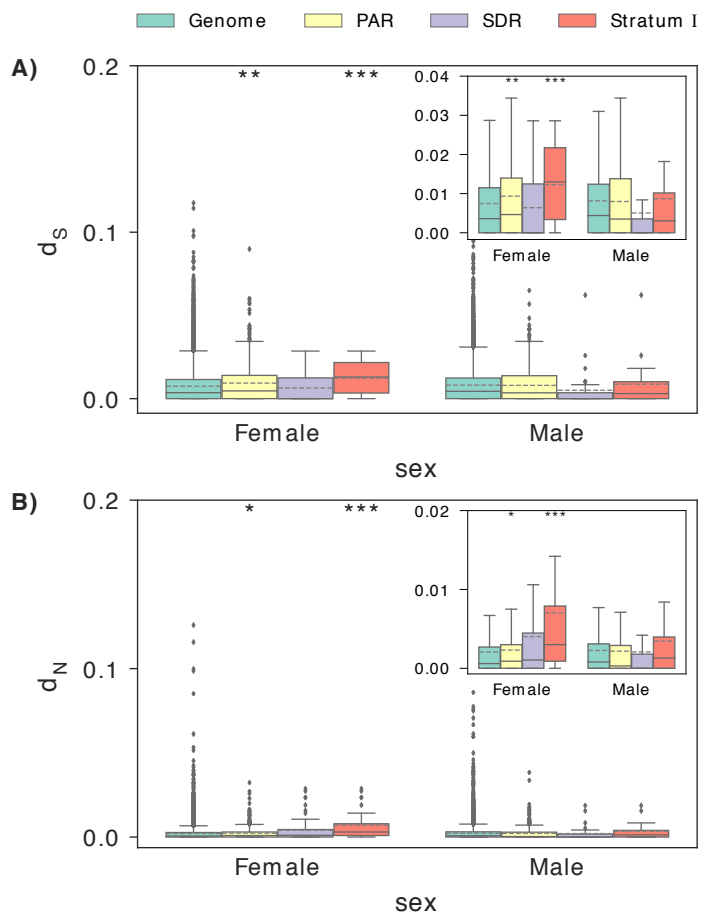

### Figure 3

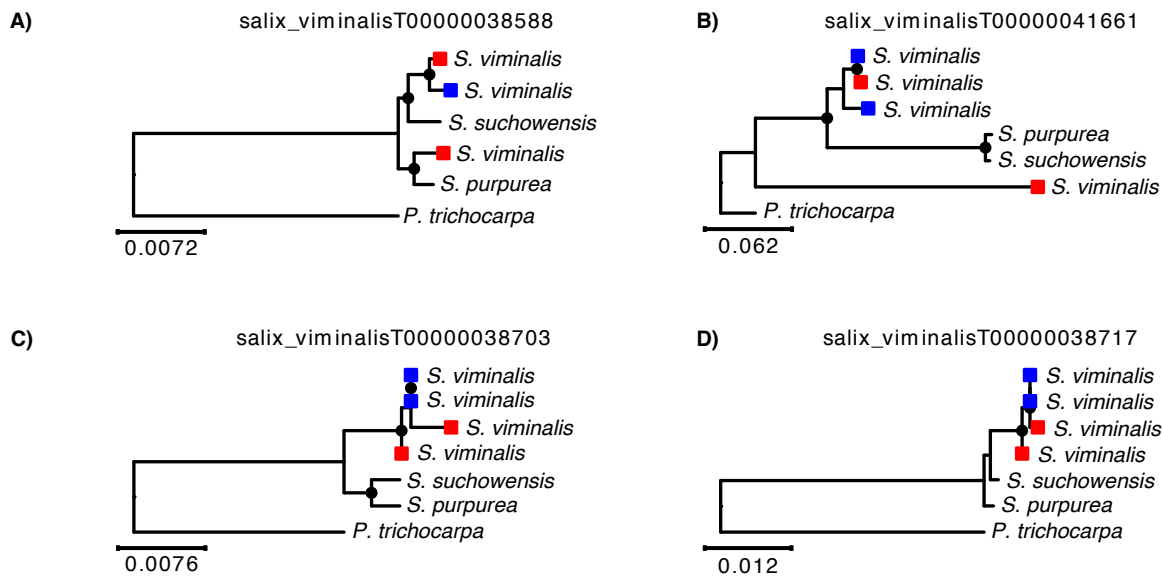

### Figure 4

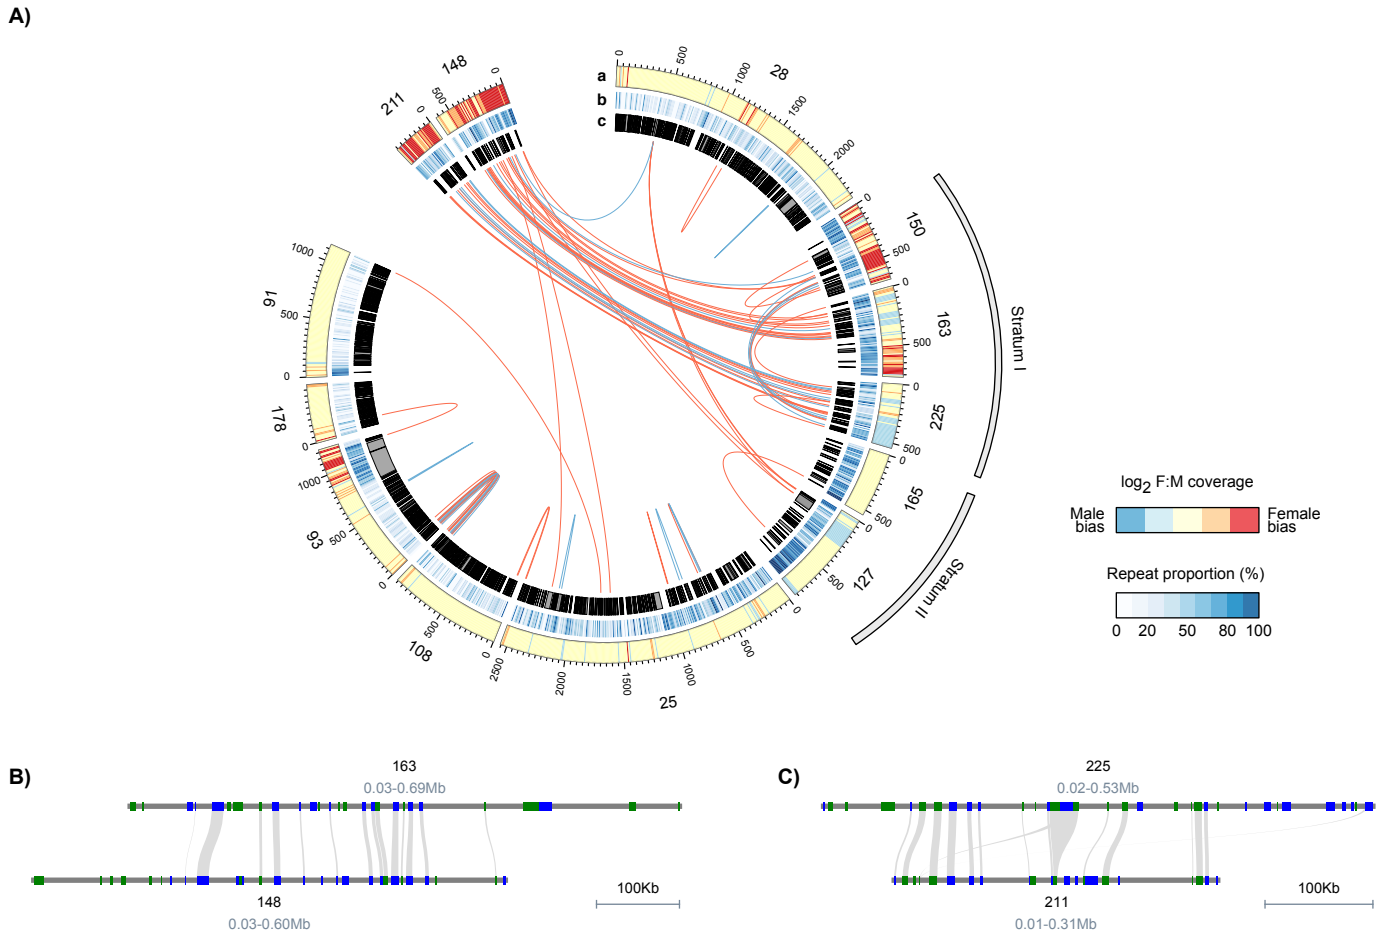

Source: http://biorxiv.org/content/10.1101/589804v1.full.pdf
